# Supplementary material for: Contrasting Sodium and Potassium Perturbations in the Hippocampus Indicate Potential Na+/K+-ATPase Dysfunction in Vascular Dementia
Source: PubMed Central journal article supplement (PMC8832097; doi:10.3389/fnagi.2022.822787), 2022-01-28
Supplement: Data_Sheet_1.pdf [file Data_Sheet_1.pdf]

## *Supplementary Material*

### Supplementary Tables

**Supplementary Table 1.** Individual patient characteristics

| Code | Class   | Age at death | Sex | Brain wt (g) | PMD (h) | Cause of death*                                              |
|------|---------|--------------|-----|--------------|---------|--------------------------------------------------------------|
| 72   | Control | 72           | M   | 1300         | 42      | Ruptured abdominal aortic aneurysm, ischaemic heart disease  |
| 122  | Control | 82           | M   | 1480         | 30      | Congestive cardiac failure, ischaemic heart disease, UTI     |
| 781  | Control | 87           | M   | 1364         | 24      | Acute renal failure, myeloma                                 |
| 930  | Control | 94           | F   | 1218         | 29.5    | Oesophageal carcinoma, ischemic heart disease                |
| 943  | Control | 70           | F   | 1032         | 33.25   | Carcinomatosis, metastatic squamous cell carcinoma of larynx |
| 948  | Control | 82           | F   | 1135         | 36      | Carcinomatosis, ovarian/peritoneal carcinoma                 |
| 957  | Control | 86           | M   | 1345         | 44.25   | Infective exacerbation of COPD                               |
| 1067 | Control | 69           | F   | 1121         | 38.25   | Metastatic pancreatic cancer                                 |
| 1083 | Control | 94           | F   | 1166         | 43.25   | Pneumonia, frailty of old age                                |
| 1092 | Control | 86           | F   | 1288         | 36.25   | Mucinous adenocarcinoma of appendix                          |
| 32   | VaD     | 84           | F   | 1230         | 20      | Not specified <sup>†</sup>                                   |
| 92   | VaD     | 72           | M   | 1460         | 41      | Not specified <sup>†</sup>                                   |
| 131  | VaD     | 86           | F   | 1060         | 28      | Not specified <sup>†</sup>                                   |
| 170  | VaD     | 90           | F   | 1150         | 31      | Not specified <sup>†</sup>                                   |
| 232  | VaD     | 89           | M   | 1330         | 30      | Pulmonary embolism, ischaemic heart disease, old age         |
| 347  | VaD     | 76           | M   | 1094         | 40      | Not specified <sup>†</sup>                                   |
| 787  | VaD     | 78           | F   | 1161         | 54      | Vascular dementia                                            |
| 931  | VaD     | 76           | F   | 1293         | 50      | Urosepsis                                                    |
| 1008 | VaD     | 87           | M   | 1160         | 34.25   | Old age, vascular dementia, leg ulcer, type-2 diabetes       |
| 1105 | VaD     | 98           | F   | 1169         | 22.75   | Vascular dementia                                            |

<sup>†</sup>Those patients in the VaD Class whose cause of death was not specified in the database had VaD as determined by post-mortem examination but not specified at the time of writing as a cause of death in the SWDBB database. Abbreviations: COPD: Chronic obstructive pulmonary disease; PMD: *Post-mortem* delay; UTI; Urinary tract infection; wt: Weight. \*Cause of death as specified by the SWDBB database.

**Supplementary Table 2.** ICP-MS calibration standard solutions

| Internal standard solution | Solution                      |                                                   |
|----------------------------|-------------------------------|---------------------------------------------------|
| 100 µg/L internal standard | 10 mL 2% nitric acid solution | 100 µL environmental calibration standard mixture |
| 50 µg/L internal standard  | 15 mL 2% nitric acid solution | 75 µL environmental calibration standard mixture  |
| 20 µg/L internal standard  | 4 mL 2% nitric acid solution  | 1 mL 100 µg/L solution                            |
| 10 µg/L internal standard  | 9 mL 2% nitric acid solution  | 1 mL 100 µg/L solution                            |
| 5 µg/L internal standard   | 9 mL 2% nitric acid solution  | 1 mL 50 µg/L solution                             |
| 2 µg/L internal standard   | 4 mL 2% nitric acid solution  | 1 mL 10 µg/L solution                             |
| 1 µg/L internal standard   | 9 mL 2% nitric acid solution  | 1 mL 10 µg/L solution                             |
| 0.5 µg/L internal standard | 9 mL 2% nitric acid solution  | 1 mL 5 µg/L solution                              |
| Blank                      | 10 mL 2% nitric acid solution | -                                                 |

**Supplementary Table 3.** Individual sample wet-weight/dry-weight hippocampal tissue ratios

| Sample ID   | Class   | Wet weight | Dry weight | Tissue (%) | Water (%) | Ratio |
|-------------|---------|------------|------------|------------|-----------|-------|
| 72          | Control | 46.7       | 9.6        | 20.6       | 79.4      | 4.86  |
| 122         | Control | 52.5       | 9.6        | 18.3       | 81.7      | 5.47  |
| 781         | Control | 46.3       | 8.3        | 17.9       | 82.1      | 5.58  |
| 930         | Control | 51.8       | 11         | 21.2       | 78.8      | 4.71  |
| 943         | Control | 53.7       | 9.4        | 17.5       | 82.5      | 5.71  |
| 948         | Control | 47.9       | 8.4        | 17.5       | 82.5      | 5.70  |
| 957         | Control | 53.9       | 9.5        | 17.6       | 82.4      | 5.67  |
| 1067        | Control | 53.1       | 9.4        | 17.7       | 82.3      | 5.65  |
| 1083        | Control | 48.1       | 7          | 14.6       | 85.4      | 6.87  |
| 1092        | Control | 46.3       | 7.1        | 15.3       | 84.7      | 6.52  |
| 32          | VaD     | 46         | 7.3        | 15.9       | 84.1      | 6.30  |
| 92          | VaD     | 54.6       | 11         | 20.1       | 79.9      | 4.96  |
| 131         | VaD     | 47.3       | 10.1       | 21.4       | 78.6      | 4.68  |
| 170         | VaD     | 50.6       | 7.5        | 14.8       | 85.2      | 6.75  |
| 232         | VaD     | 45.7       | 8.1        | 17.7       | 82.3      | 5.64  |
| 347         | VaD     | 52.5       | 10.2       | 19.4       | 80.6      | 5.15  |
| 787         | VaD     | 48.8       | 6.7        | 13.7       | 86.3      | 7.28  |
| 931         | VaD     | 49.7       | 7.2        | 14.5       | 85.5      | 6.90  |
| 1008        | VaD     | 51.6       | 8.8        | 17.1       | 82.9      | 5.86  |
| 1105        | VaD     | 50         | 8.5        | 17.0       | 83.0      | 5.88  |
| Av. Control |         | 50.03      | 8.93       | 17.83      | 82.17     | 5.68  |
| Av. VaD     |         | 49.68      | 8.54       | 17.16      | 82.84     | 5.94  |

No statistically significant case-control differences were observed for hippocampal tissue ratios.

**Supplementary Table 4.** Dry-weight power analysis, effect size, and sample size estimates

| Element | Power ( $p < 0.05$ ) | Required sample size ( $p < 0.05$ ) | Effect size |
|---------|----------------------|-------------------------------------|-------------|
| Na      | 0.652                | 46                                  | 1.111       |
| Mg      | 0.187                | 208                                 | 0.504       |
| K       | 0.144                | 298                                 | 0.420       |
| Ca      | 0.207                | 182                                 | 0.538       |
| Mn      | 0.081                | 890                                 | 0.242       |
| Fe      | 0.072                | 1246                                | 0.205       |
| Cu      | 0.512                | 62                                  | 0.941       |
| Zn      | 0.517                | 62                                  | 0.946       |
| Se      | 0.211                | 178                                 | 0.545       |

**Supplementary Table 5.** Wet-weight power analysis, effect size, and sample size estimates

| Element | Power ( $p < 0.05$ ) | Required sample size ( $p < 0.05$ ) | Effect size |
|---------|----------------------|-------------------------------------|-------------|
| Na      | 0.936                | 22                                  | 1.648       |
| Mg      | 0.090                | 692                                 | 0.275       |
| K       | 0.797                | 32                                  | 1.321       |
| Ca      | 0.260                | 138                                 | 0.620       |
| Mn      | 0.070                | 1362                                | 0.196       |
| Fe      | 0.215                | 174                                 | 0.551       |
| Cu      | 0.097                | 584                                 | 0.299       |
| Zn      | 0.051                | 46290                               | 0.034       |
| Se      | 0.081                | 894                                 | 0.244       |

**Supplementary Table 6.** PCA loading scores for the multiple age-related dementia dry-weight metallomic data

| Element | PC1           | PC2           |
|---------|---------------|---------------|
| Na      | -0.359        | 0.348         |
| Mg      | <b>-0.443</b> | -0.101        |
| K       | -0.352        | <b>-0.428</b> |
| Ca      | -0.217        | <b>0.470</b>  |
| Mn      | -0.365        | 0.352         |
| Fe      | -0.293        | 0.128         |
| Cu      | -0.310        | -0.426        |
| Zn      | <b>-0.398</b> | 0.001         |
| Se      | -0.174        | -0.378        |

The loadings indicate the correlation coefficients between elements and components. The top two loadings with the most extreme value (positive or negative) for each principal component are represented in bold. Abbreviation: PC: Principal component.

**Supplementary Table 7.** Dry-weight individual patient metal concentrations

| <b>Hippocampus</b> |                            | <sup>23</sup> Na | <sup>24</sup> Mg | <sup>39</sup> K | <sup>44</sup> Ca | <sup>55</sup> Mn | <sup>56</sup> Fe | <sup>63</sup> Cu | <sup>66</sup> Zn | <sup>78</sup> Se |
|--------------------|----------------------------|------------------|------------------|-----------------|------------------|------------------|------------------|------------------|------------------|------------------|
| Sample ID          | Class                      | mmol/kg          | mmol/kg          | mmol/kg         | mmol/kg          | μmol/kg          | mmol/kg          | μmol/kg          | μmol/kg          | μmol/kg          |
| 32-B1              | VaD                        | 704              | 32               | 289             | 18.2             | 35               | 5.45             | 322              | 1395             | 10.96            |
| 92-B3              | VaD                        | 492              | 26               | 251             | 8.3              | 25               | 3.60             | 281              | 1331             | 9.33             |
| 131-B5             | VaD                        | 439              | 26               | 297             | 11.9             | 23               | 4.72             | 235              | 1111             | 31.01            |
| 170-B6             | VaD                        | 672              | 33               | 396             | 12.7             | 27               | 4.03             | 359              | 1728             | 10.94            |
| 232-B7             | VaD                        | 460              | 29               | 333             | 8.4              | 24               | 3.26             | 397              | 1921             | 12.48            |
| 347-B8             | VaD                        | 482              | 27               | 286             | 8.0              | 22               | 3.62             | 288              | 1524             | 9.23             |
| 787-B10            | VaD                        | 967              | 28               | 280             | 15.1             | 29               | 3.32             | 348              | 1809             | 9.42             |
| 931-B12            | VaD                        | 681              | 31               | 280             | 52.5             | 52               | 4.29             | 306              | 1720             | 9.35             |
| 1008-B16           | VaD                        | 587              | 29               | 275             | 15.7             | 25               | 5.22             | 347              | 1331             | 8.89             |
| 1105-B20           | VaD                        | 603              | 31               | 357             | 12.9             | 32               | 5.03             | 457              | 1266             | 11.12            |
| 72-B2              | Control                    | 394              | 26               | 317             | 13.0             | 23               | 3.83             | 271              | 906              | 9.31             |
| 122-B4             | Control                    | 430              | 29               | 302             | 8.1              | 27               | 5.85             | 299              | 1529             | 9.57             |
| 781-B9             | Control                    | 491              | 27               | 276             | 11.9             | 23               | 3.69             | 204              | 1148             | 9.14             |
| 930-B11            | Control                    | 336              | 27               | 308             | 7.8              | 26               | 3.47             | 256              | 967              | 8.62             |
| 943-B13            | Control                    | 505              | 28               | 336             | 11.0             | 32               | 3.52             | 267              | 1486             | 8.87             |
| 948-B14            | Control                    | 446              | 28               | 366             | 10.8             | 26               | 4.33             | 296              | 1326             | 10.22            |
| 957-B15            | Control                    | 518              | 26               | 266             | 8.5              | 28               | 3.63             | 264              | 1220             | 11.37            |
| 1067-B17           | Control                    | 380              | 31               | 402             | 12.1             | 24               | 4.93             | 348              | 1463             | 10.47            |
| 1083-B18           | Control                    | 658              | 32               | 340             | 18.2             | 38               | 4.82             | 376              | 1436             | 11.29            |
| 1092-B19           | Control                    | 548              | 27               | 296             | 11.1             | 28               | 2.90             | 210              | 1297             | 9.24             |
|                    | <b>Av. VaD</b>             | 609              | 29               | 304             | 16.4             | 29               | 4.25             | 334              | 1514             | 12.27            |
|                    | <b>Av. Control</b>         | 471              | 28               | 321             | 11.3             | 28               | 4.10             | 279              | 1278             | 9.81             |
|                    | <b>Mann-Whitney U test</b> | <b>0.0355</b>    | 0.248            | 0.280           | 0.280            | 0.853            | 0.796            | 0.052            | 0.089            | 0.315            |
|                    | <b>Welch's t-test</b>      | <b>0.033</b>     | 0.267            | 0.396           | 0.258            | 0.541            | 0.683            | 0.052            | <b>0.045</b>     | 0.277            |

**Supplementary Table 8.** Wet-weight individual patient metal concentrations

| <b>Hippocampus</b> |                            | <sup>23</sup> Na | <sup>24</sup> Mg | <sup>39</sup> K | <sup>44</sup> Ca | <sup>55</sup> Mn | <sup>56</sup> Fe | <sup>63</sup> Cu | <sup>66</sup> Zn | <sup>78</sup> Se |
|--------------------|----------------------------|------------------|------------------|-----------------|------------------|------------------|------------------|------------------|------------------|------------------|
| Sample ID          | mmol/kg                    | mmol/kg          | mmol/kg          | mmol/kg         | μmol/kg          | mmol/kg          | μmol/kg          | μmol/kg          | μmol/kg          | μmol/kg          |
| 32-A1              | VaD                        | 107              | 4.54             | 41              | 3.84             | 4.92             | 0.711            | 39               | 187              | 1.62             |
| 92-A3              | VaD                        | 89               | 4.43             | 44              | 1.67             | 4.38             | 0.615            | 40               | 206              | 1.63             |
| 131-A5             | VaD                        | 88               | 5.29             | 57              | 2.76             | 5.05             | 1.077            | 46               | 240              | 7.43             |
| 170-A6             | VaD                        | 91               | 4.89             | 59              | 1.39             | 4.32             | 0.652            | 65               | 267              | 2.03             |
| 232-A7             | VaD                        | 76               | 4.65             | 53              | 2.46             | 3.80             | 0.639            | 53               | 262              | 1.93             |
| 347-A8             | VaD                        | 92               | 4.61             | 46              | 1.76             | 5.28             | 0.521            | 64               | 278              | 1.62             |
| 787-A10            | VaD                        | 128              | 3.97             | 37              | 2.12             | 4.01             | 0.374            | 44               | 280              | 1.51             |
| 931-A12            | VaD                        | 95               | 5.75             | 40              | 31.17            | 16.81            | 0.750            | 42               | 285              | 1.39             |
| 1008-A16           | VaD                        | 105              | 4.42             | 43              | 1.99             | 4.58             | 0.540            | 53               | 223              | 1.34             |
| 1105-A20           | VaD                        | 99               | 4.59             | 49              | 1.92             | 5.27             | 0.535            | 45               | 208              | 1.67             |
| 72-A2              | Control                    | 80               | 5.25             | 64              | 1.51             | 5.97             | 0.649            | 89               | 214              | 2.02             |
| 122-A4             | Control                    | 81               | 5.02             | 55              | 1.98             | 4.85             | 1.091            | 56               | 256              | 1.88             |
| 781-A9             | Control                    | 82               | 4.95             | 52              | 1.85             | 4.20             | 0.718            | 65               | 253              | 1.90             |
| 930-A11            | Control                    | 71               | 4.79             | 60              | 2.03             | 6.92             | 0.728            | 80               | 285              | 1.76             |
| 943-A13            | Control                    | 72               | 4.31             | 52              | 1.77             | 4.35             | 0.700            | 39               | 241              | 1.59             |
| 948-A14            | Control                    | 76               | 4.47             | 60              | 1.76             | 4.41             | 0.749            | 44               | 199              | 1.59             |
| 957-A15            | Control                    | 88               | 4.71             | 50              | 1.43             | 4.41             | 0.637            | 48               | 226              | 2.11             |
| 1067-A17           | Control                    | 61               | 5.48             | 69              | 1.64             | 4.46             | 0.780            | 55               | 250              | 1.64             |
| 1083-A18           | Control                    | 92               | 4.65             | 49              | 3.32             | 5.09             | 0.701            | 45               | 209              | 1.42             |
| 1092-A19           | Control                    | 81               | 4.53             | 50              | 1.71             | 5.05             | 0.471            | 30               | 282              | 1.51             |
|                    | <b>Av. VaD</b>             | 97               | 4.71             | 47              | 5.11             | 5.84             | 0.641            | 49               | 244              | 2.22             |
|                    | <b>Av. Control</b>         | 78               | 4.82             | 56              | 1.90             | 4.97             | 0.722            | 55               | 242              | 1.74             |
|                    | <b>Mann-Whitney test U</b> | <b>0.0015</b>    | 0.436            | <b>0.012</b>    | 0.143            | 0.796            | 0.166            | 0.579            | >0.9999          | 0.739            |
|                    | <b>Welch's t-test</b>      | <b>0.0027</b>    | 0.597            | <b>0.010</b>    | 0.298            | 0.506            | 0.306            | 0.386            | 0.889            | 0.441            |

**Supplementary Table 9.** Log-transformed dry-weight individual patient metal concentrations

| <b>Hippocampus</b> |                       | <sup>23</sup> Na | <sup>24</sup> Mg | <sup>39</sup> K | <sup>44</sup> Ca | <sup>55</sup> Mn | <sup>56</sup> Fe | <sup>63</sup> Cu | <sup>66</sup> Zn | <sup>78</sup> Se |
|--------------------|-----------------------|------------------|------------------|-----------------|------------------|------------------|------------------|------------------|------------------|------------------|
| Sample ID          | mmol/kg               | mmol/kg          | mmol/kg          | μmol/kg         | mmol/kg          | μmol/kg          | μmol/kg          | μmol/kg          | μmol/kg          | umol/kg          |
| 32-B1              | VaD                   | 2.85             | 1.50             | 2.46            | 1.26             | 1.54             | 0.736            | 2.51             | 3.14             | 1.040            |
| 92-B3              | VaD                   | 2.69             | 1.42             | 2.40            | 0.92             | 1.41             | 0.556            | 2.45             | 3.12             | 0.970            |
| 131-B5             | VaD                   | 2.64             | 1.42             | 2.47            | 1.08             | 1.37             | 0.674            | 2.37             | 3.05             | 1.491            |
| 170-B6             | VaD                   | 2.83             | 1.51             | 2.60            | 1.10             | 1.43             | 0.605            | 2.56             | 3.24             | 1.039            |
| 232-B7             | VaD                   | 2.66             | 1.46             | 2.52            | 0.92             | 1.39             | 0.513            | 2.60             | 3.28             | 1.096            |
| 347-B8             | VaD                   | 2.68             | 1.43             | 2.46            | 0.90             | 1.35             | 0.559            | 2.46             | 3.18             | 0.965            |
| 787-B10            | VaD                   | 2.99             | 1.45             | 2.45            | 1.18             | 1.46             | 0.521            | 2.54             | 3.26             | 0.974            |
| 931-B12            | VaD                   | 2.83             | 1.49             | 2.45            | 1.72             | 1.71             | 0.632            | 2.49             | 3.24             | 0.971            |
| 1008-B16           | VaD                   | 2.77             | 1.46             | 2.44            | 1.20             | 1.39             | 0.718            | 2.54             | 3.12             | 0.949            |
| 1105-B20           | VaD                   | 2.78             | 1.49             | 2.55            | 1.11             | 1.51             | 0.702            | 2.66             | 3.10             | 1.046            |
| 72-B2              | Control               | 2.60             | 1.42             | 2.50            | 1.12             | 1.36             | 0.584            | 2.43             | 2.96             | 0.969            |
| 122-B4             | Control               | 2.63             | 1.46             | 2.48            | 0.91             | 1.43             | 0.767            | 2.48             | 3.18             | 0.981            |
| 781-B9             | Control               | 2.69             | 1.43             | 2.44            | 1.08             | 1.36             | 0.567            | 2.31             | 3.06             | 0.961            |
| 930-B11            | Control               | 2.53             | 1.43             | 2.49            | 0.89             | 1.42             | 0.540            | 2.41             | 2.99             | 0.936            |
| 943-B13            | Control               | 2.70             | 1.44             | 2.53            | 1.04             | 1.50             | 0.546            | 2.43             | 3.17             | 0.948            |
| 948-B14            | Control               | 2.65             | 1.45             | 2.56            | 1.03             | 1.42             | 0.636            | 2.47             | 3.12             | 1.010            |
| 957-B15            | Control               | 2.71             | 1.42             | 2.43            | 0.93             | 1.44             | 0.560            | 2.42             | 3.09             | 1.056            |
| 1067-B17           | Control               | 2.58             | 1.49             | 2.60            | 1.08             | 1.37             | 0.693            | 2.54             | 3.17             | 1.020            |
| 1083-B18           | Control               | 2.82             | 1.50             | 2.53            | 1.26             | 1.58             | 0.683            | 2.57             | 3.16             | 1.053            |
| 1092-B19           | Control               | 2.74             | 1.42             | 2.47            | 1.05             | 1.45             | 0.463            | 2.32             | 3.11             | 0.966            |
|                    | <b>Av. VaD</b>        | 2.77             | 1.46             | 2.48            | 1.14             | 1.45             | 0.622            | 2.52             | 3.17             | 1.054            |
|                    | <b>Av. Control</b>    | 2.67             | 1.45             | 2.50            | 1.04             | 1.43             | 0.604            | 2.44             | 3.10             | 0.990            |
|                    | <b>Welch's t test</b> | <b>0.024</b>     | 0.268            | 0.367           | 0.249            | 0.606            | 0.652            | <b>0.0497</b>    | <b>0.0498</b>    | 0.248            |

**Supplementary Table 10.** Log-transformed wet-weight individual patient metal concentrations

| <b>Hippocampus</b> |                       | <sup>23</sup> Na | <sup>24</sup> Mg | <sup>39</sup> K | <sup>44</sup> Ca | <sup>55</sup> Mn | <sup>56</sup> Fe | <sup>63</sup> Cu | <sup>66</sup> Zn | <sup>78</sup> Se |
|--------------------|-----------------------|------------------|------------------|-----------------|------------------|------------------|------------------|------------------|------------------|------------------|
| Sample ID          | mmol/kg               | mmol/kg          | mmol/kg          | μmol/kg         | mmol/kg          | μmol/kg          | μmol/kg          | μmol/kg          | μmol/kg          | umol/kg          |
| 32-A1              | VaD                   | 2.03             | 0.657            | 1.61            | 0.584            | 0.692            | -0.148           | 1.59             | 2.27             | 0.209            |
| 92-A3              | VaD                   | 1.95             | 0.647            | 1.65            | 0.222            | 0.641            | -0.211           | 1.60             | 2.31             | 0.212            |
| 131-A5             | VaD                   | 1.94             | 0.722            | 1.76            | 0.440            | 0.703            | 0.032            | 1.66             | 2.38             | 0.871            |
| 170-A6             | VaD                   | 1.96             | 0.689            | 1.77            | 0.144            | 0.635            | -0.186           | 1.81             | 2.43             | 0.306            |
| 232-A7             | VaD                   | 1.88             | 0.667            | 1.73            | 0.391            | 0.580            | -0.195           | 1.72             | 2.42             | 0.285            |
| 347-A8             | VaD                   | 1.97             | 0.664            | 1.66            | 0.245            | 0.723            | -0.283           | 1.80             | 2.44             | 0.210            |
| 787-A10            | VaD                   | 2.11             | 0.599            | 1.57            | 0.327            | 0.603            | -0.428           | 1.64             | 2.45             | 0.178            |
| 931-A12            | VaD                   | 1.98             | 0.759            | 1.60            | 1.494            | 1.226            | -0.125           | 1.62             | 2.45             | 0.143            |
| 1008-A16           | VaD                   | 2.02             | 0.645            | 1.63            | 0.300            | 0.661            | -0.268           | 1.73             | 2.35             | 0.128            |
| 1105-A20           | VaD                   | 2.00             | 0.662            | 1.69            | 0.284            | 0.722            | -0.271           | 1.66             | 2.32             | 0.222            |
| 72-A2              | Control               | 1.90             | 0.720            | 1.81            | 0.177            | 0.776            | -0.188           | 1.95             | 2.33             | 0.305            |
| 122-A4             | Control               | 1.91             | 0.701            | 1.74            | 0.296            | 0.686            | 0.038            | 1.74             | 2.41             | 0.274            |
| 781-A9             | Control               | 1.91             | 0.695            | 1.71            | 0.266            | 0.624            | -0.144           | 1.81             | 2.40             | 0.279            |
| 930-A11            | Control               | 1.85             | 0.680            | 1.78            | 0.308            | 0.840            | -0.138           | 1.90             | 2.46             | 0.246            |
| 943-A13            | Control               | 1.86             | 0.635            | 1.71            | 0.249            | 0.638            | -0.155           | 1.59             | 2.38             | 0.201            |
| 948-A14            | Control               | 1.88             | 0.651            | 1.78            | 0.244            | 0.644            | -0.126           | 1.64             | 2.30             | 0.203            |
| 957-A15            | Control               | 1.95             | 0.673            | 1.70            | 0.156            | 0.645            | -0.196           | 1.68             | 2.35             | 0.325            |
| 1067-A17           | Control               | 1.78             | 0.739            | 1.84            | 0.216            | 0.649            | -0.108           | 1.74             | 2.40             | 0.215            |
| 1083-A18           | Control               | 1.96             | 0.667            | 1.69            | 0.521            | 0.707            | -0.154           | 1.66             | 2.32             | 0.152            |
| 1092-A19           | Control               | 1.91             | 0.656            | 1.70            | 0.234            | 0.704            | -0.327           | 1.47             | 2.45             | 0.178            |
|                    | <b>Av. VaD</b>        | 1.98             | 0.671            | 1.67            | 0.443            | 0.719            | -0.208           | 1.68             | 2.38             | 0.276            |
|                    | <b>Av. Control</b>    | 1.89             | 0.682            | 1.75            | 0.267            | 0.691            | -0.150           | 1.72             | 2.38             | 0.238            |
|                    | <b>Welch's t-test</b> | <b>0.0018</b>    | 0.552            | <b>0.0089</b>   | 0.195            | 0.670            | 0.235            | 0.519            | 0.932            | 0.597            |

**Supplementary Figures**
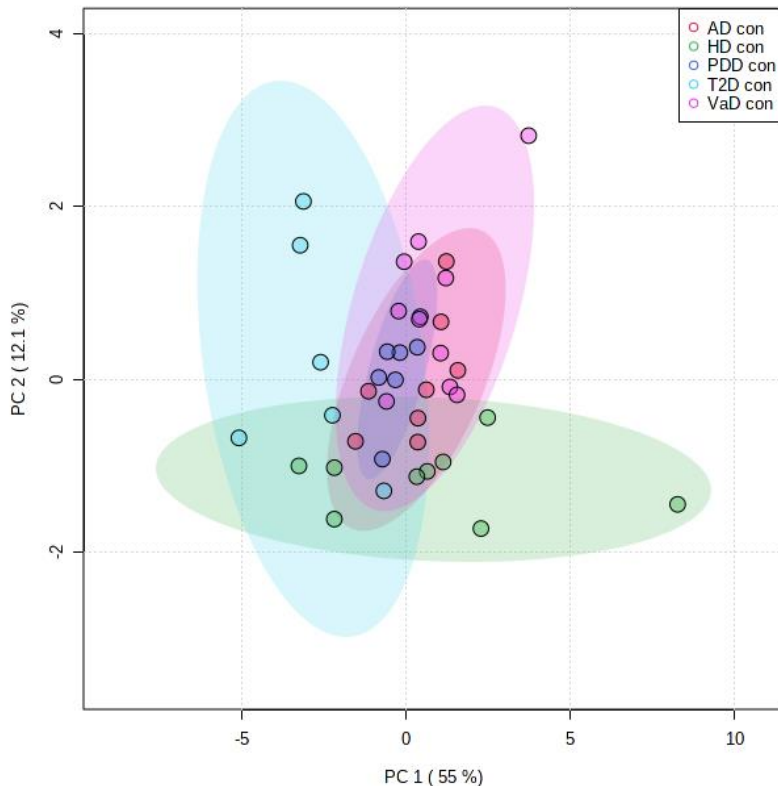

**Supplementary Figure 1. Two dimensional PCA plot for human dry-weight hippocampal *post-mortem* tissue from multiple control cohorts.** Data represent a PCA plot using ICP-MS-metallomic data from VaD con (n = 10; pink), AD con (n = 8; red), HD con (n = 9; green), PDD con (n = 7; dark blue), T2D con (n = 6; light blue) dry-weight hippocampal *post-mortem* tissue. The coloured ellipses around each cohort signify 95% confidence regions. The first (Dim1) and second (Dim2) principal components contribute to 55% and 12.1% of the total variance, respectively. No visible separation was apparent between all cohorts. Abbreviations: AD: Alzheimer’s disease; Con: Control; ICP-MS: Inductively coupled plasma-mass spectrometry; PDD: Parkinson’s disease dementia; T2D: Type-2 diabetes; VaD: Vascular dementia.



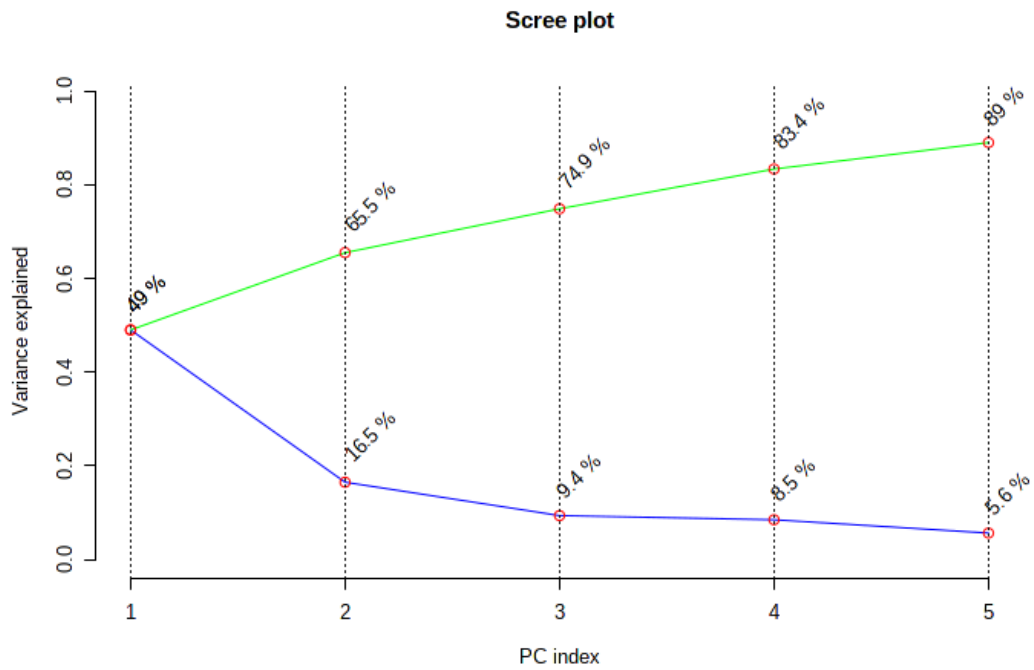

**Supplementary Figure 2. Scree plot for human dry-weight hippocampal *post-mortem* tissue from multiple age-related demented diseases and T2D.** Data shown represents the variance explained for the first five dimensions (principal components) within the dry-weight multiple dementia dataset.

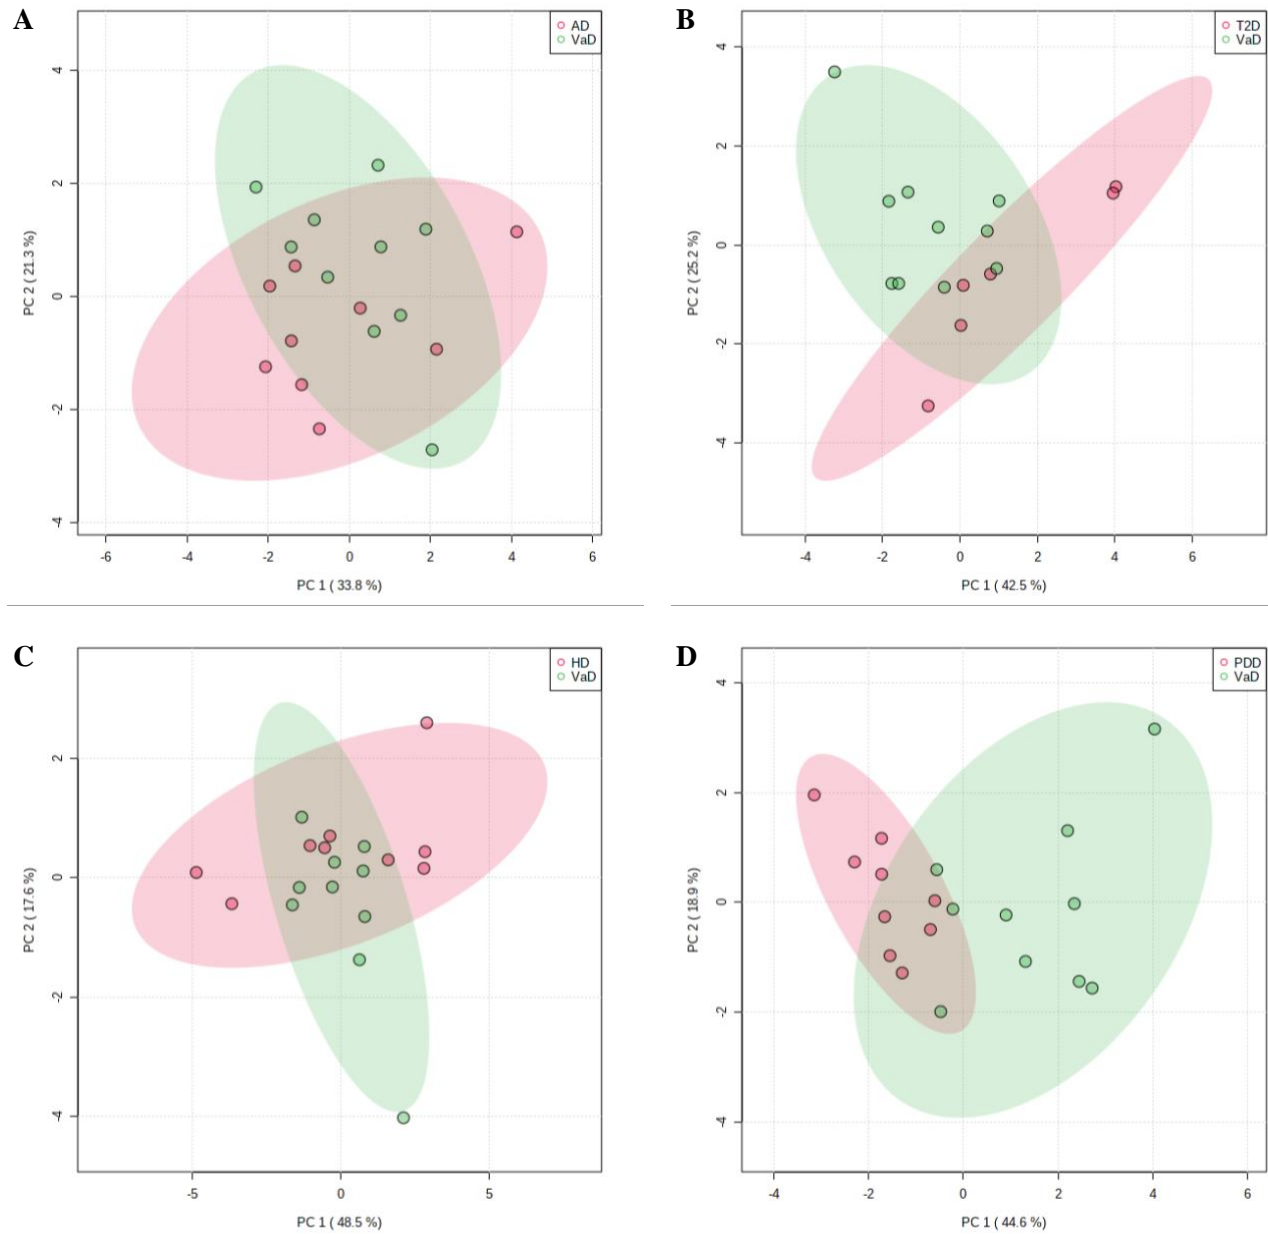

**Supplementary Figure 3. Two dimensional PCA pairwise disease comparisons for human dry-weight hippocampal *post-mortem* tissue between VaD and other dementia-causing diseases.** Data represent pairwise PCA disease comparison plots using ICP-MS metallomic data. Comparisons are: A) VaD vs AD; B) VaD vs T2D; C) VaD vs HD; and D) VaD vs PDD. No visible separation was apparent across all disease comparisons. Abbreviations: AD: Alzheimer’s disease; Con: Control; ICP-MS: Inductively coupled plasma-mass spectrometry; PDD: Parkinson’s disease dementia; T2D: Type-2 diabetes; VaD: Vascular dementia.
